# Supplementary material
Source: PubMed Central journal article supplement (PMC5529164)

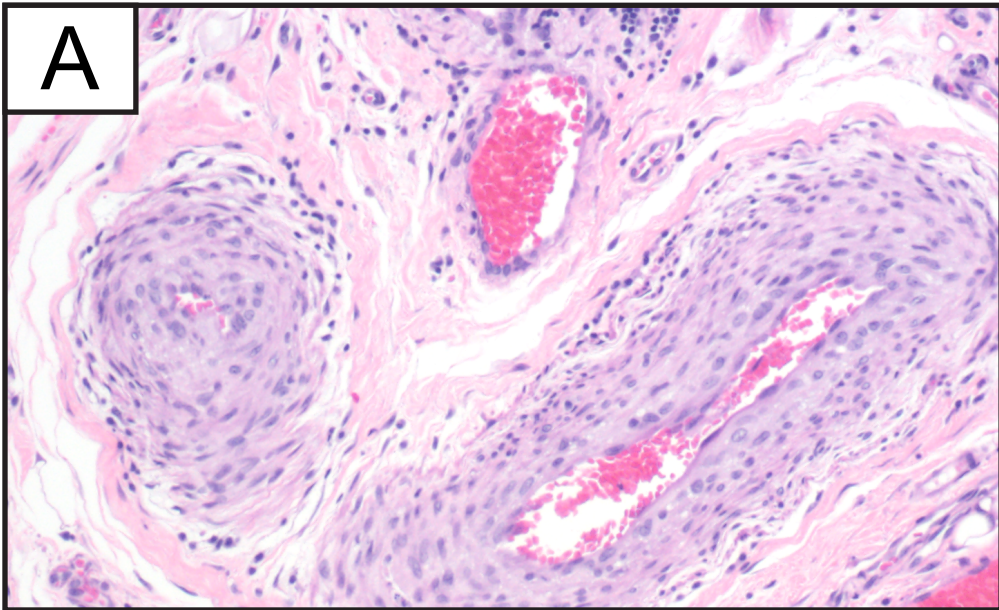

Original Picture

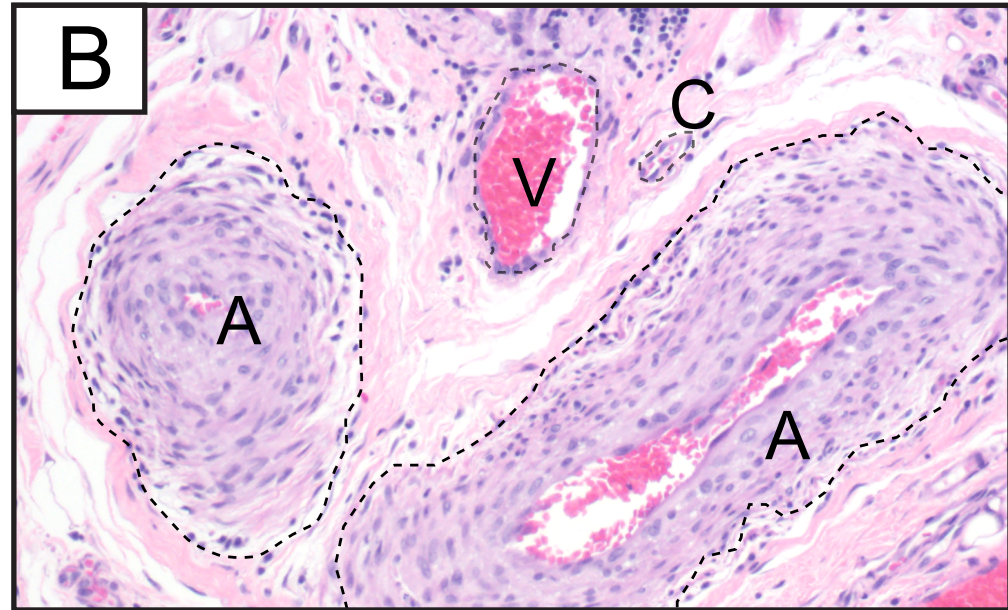

Vessel Characterization

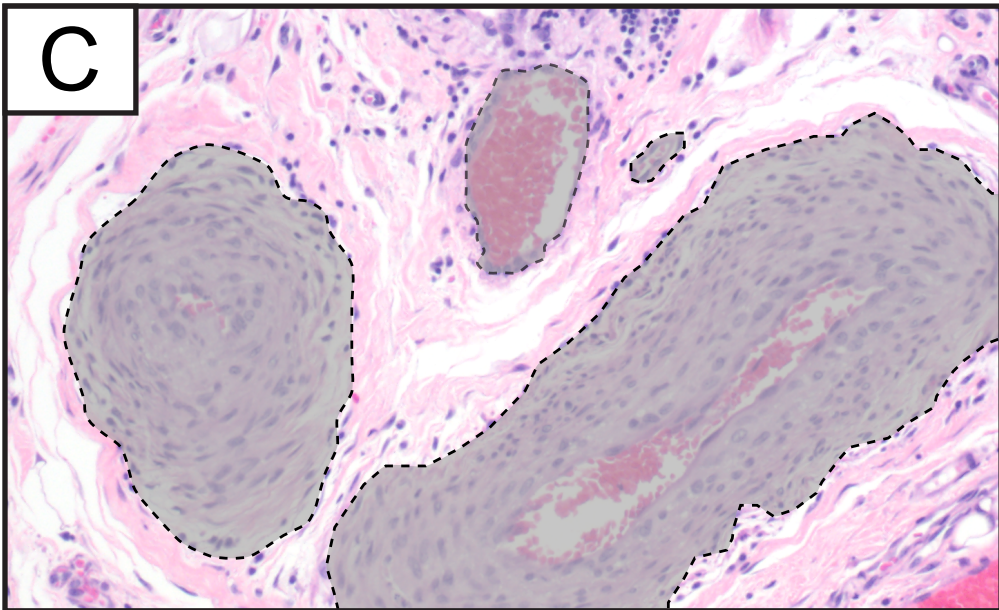

Area Measurement

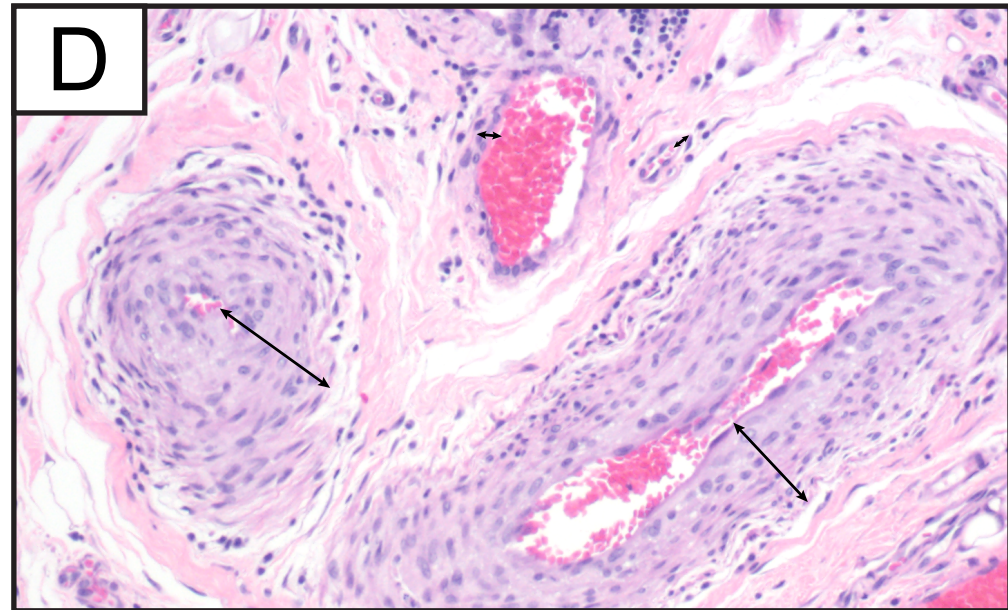

Thickness Measurement

Supplement: NIHMS879597-supplement-Supplemental_Figure_1.pdf [file NIHMS879597-supplement-Supplemental_Figure_1.pdf]
